# Supplementary material for: Niche Partitioning in the&nbsp;Rimicaris&nbsp;Exoculata Holobiont: The Case of the First Symbiotic Zetaproteobacteria
Source: Research Square preprint supplement (doi:10.21203/rs.3.rs-136571/v1), 2020-12-31
Supplement: Supplementary file 1 [file 378c4232363596687d8d8551.xlsx]

## Sheet: Additional_File5_bins_percent_m
samples	RB_MAG_00001	RB_MAG_00002	RB_MAG_00003	RB_MAG_00004	RB_MAG_00005	RB_MAG_00006	RB_MAG_00007	RB_MAG_00008	RB_MAG_00009	RB_MAG_00010	RB_MAG_00011	RB_MAG_00012	RB_MAG_00013	RB_MAG_00014	RB_MAG_00015	RB_MAG_00016	RB_MAG_00017	RB_MAG_00018	RB_MAG_00019	RB_MAG_00020	RB_MAG_00021	RB_MAG_00022	RB_MAG_00024	RB_MAG_00025	RB_MAG_00026	RB_MAG_00027	RB_MAG_00028	RB_MAG_00029	TAG_MAG_00001	TAG_MAG_00002	TAG_MAG_00003	TAG_MAG_00004	TAG_MAG_00005	TAG_MAG_00006	TAG_MAG_00007	TAG_MAG_00008	TAG_MAG_00009	TAG_MAG_00010	TAG_MAG_00011	TAG_MAG_00012	TAG_MAG_00013	TAG_MAG_00014	TAG_MAG_00015	TAG_MAG_00016	TAG_MAG_00017	TAG_MAG_00018	TAG_MAG_00019	TAG_MAG_00020	TAG_MAG_00021
RE12	0.8987	0.2126	0.1274	0.2328	0.0787	0.1696	0.0703	0.1212	0.1751	0.1752	0.5001	0.203	0.0076	0.3103	1.7265	0.0811	0.0038	0.3723	0.0585	0.0142	0.0434	0.1702	0.013	5.0058	0.0109	0.2775	0.0072	0.0277	0.016	0.072	0.0004	0.0199	0.0289	1.2058	0.0047	0.1113	0.0008	0.0057	0.0762	0.2115	0.0259	0.0163	0.1009	0.0016	0.0172	0.0312	3.3235	0.0007	0.0019
RE13	0.9167	0.1985	0.216	0.4613	0.1655	0.5143	0.0707	0.1357	0.3987	0.2757	0.5531	0.288	0.0808	0.9844	1.6711	0.1438	0.0792	0.5085	0.0416	0.0226	0.08	0.1298	0.0206	7.8317	0.0683	0.1393	0.0856	0.0604	0.0274	0.0679	0.0022	0.0254	0.0516	1.9112	0.0044	0.1576	0.0168	0.0083	0.0681	0.2106	0.0125	0.0168	0.3194	0.0021	0.0338	0.0324	5.1214	0.0005	0.0017
RE5	0.3414	0.0218	0.0166	0.0199	0.0015	0.1217	0.0014	0.0822	0.0896	0.1554	0.0016	0.0351	0.0013	5.8603	0.1246	0.5241	0.0002	0.3013	0.0022	0.0095	0.0009	0.0824	0.0011	2.492	0.0002	0.0022	0.0009	0.0001	0.1194	0.0928	0.3983	0.6218	0.7061	0.6988	0.7551	0.7579	0.1346	0.1682	0.2524	0.9277	0.1283	0.7571	9.9743	0.1246	0.3481	0.8421	5.8617	0.0449	0.2221
RE6	0.1635	0.0428	0.018	0.0325	0.0017	0.1501	0.0007	0.0157	0.1147	0.0788	0.0016	0.032	0.0009	1.4655	0.1135	0.1476	0.0001	0.0626	0.002	0.0013	0.0034	0.1582	0.0006	3.329	0.0001	0.0007	0.0006	0.0001	0.0852	0.1345	0.1958	0.5231	0.2006	2.3908	0.6997	0.145	0.1223	0.2227	0.1586	0.4243	0.3373	0.1505	2.338	0.0195	0.4399	0.4786	7.8971	0.0484	0.105
[truncated: 1 more columns]
